# Supplementary material for: A culture method with berbamine, a plant alkaloid, enhances CAR-T cell efficacy through modulating cellular metabolism
Source: PubMed Central journal article supplement (PMC11150386; doi:10.1038/s42003-024-06297-0), 2024-06-04
Supplement: 42003_2024_6297_MOESM1_ESM.pdf [file 42003_2024_6297_MOESM1_ESM.pdf]

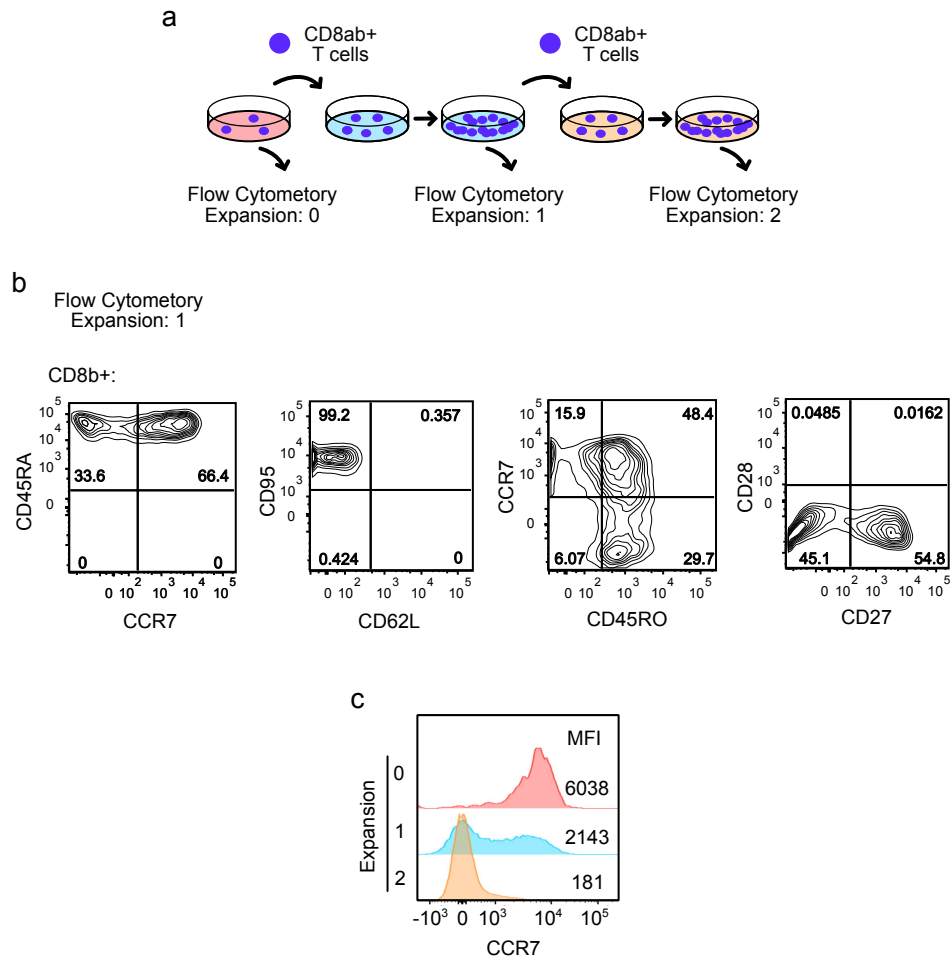

### Supplementary Figure 1

- (a) Experimental scheme to compare the expression of T cell markers.  
 (b) Representative flow cytometry plots of T-iPS-T cells at Expansion 1.  
 (c) Expression levels of CCR7 at Expansions 0, 1, and 2.

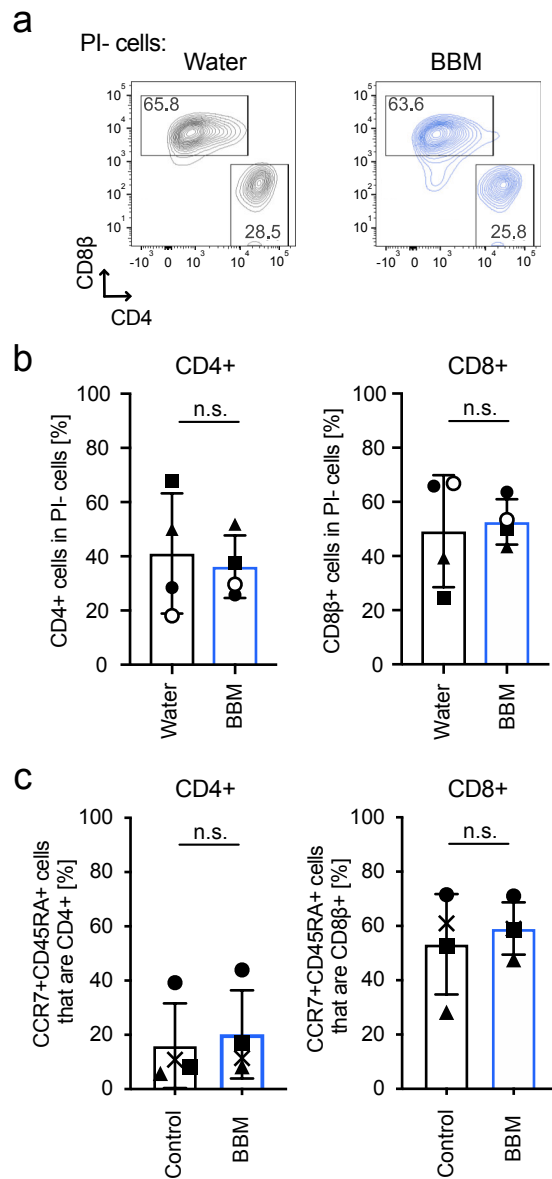

### Supplementary Figure 2

(a) Representative flow cytometry plots that depict expression of CD4 and CD8β in cultured CD3+ cells.

(b) Frequencies of CD4+ (left) and CD8β+ (right) cells.

(c) Frequencies of CCR7+CD45RA+ cells in CD4+ (left) and CD8β+ (right) cell populations.

Each data point in graphs represents one healthy donor. Error bars indicate SD from four donors. Statistical significance is denoted as follows: \*,  $p < 0.05$ ; \*\*,  $p < 0.01$ ; \*\*\*,  $p < 0.001$ ; and 'n.s.', not significant (paired t-test).

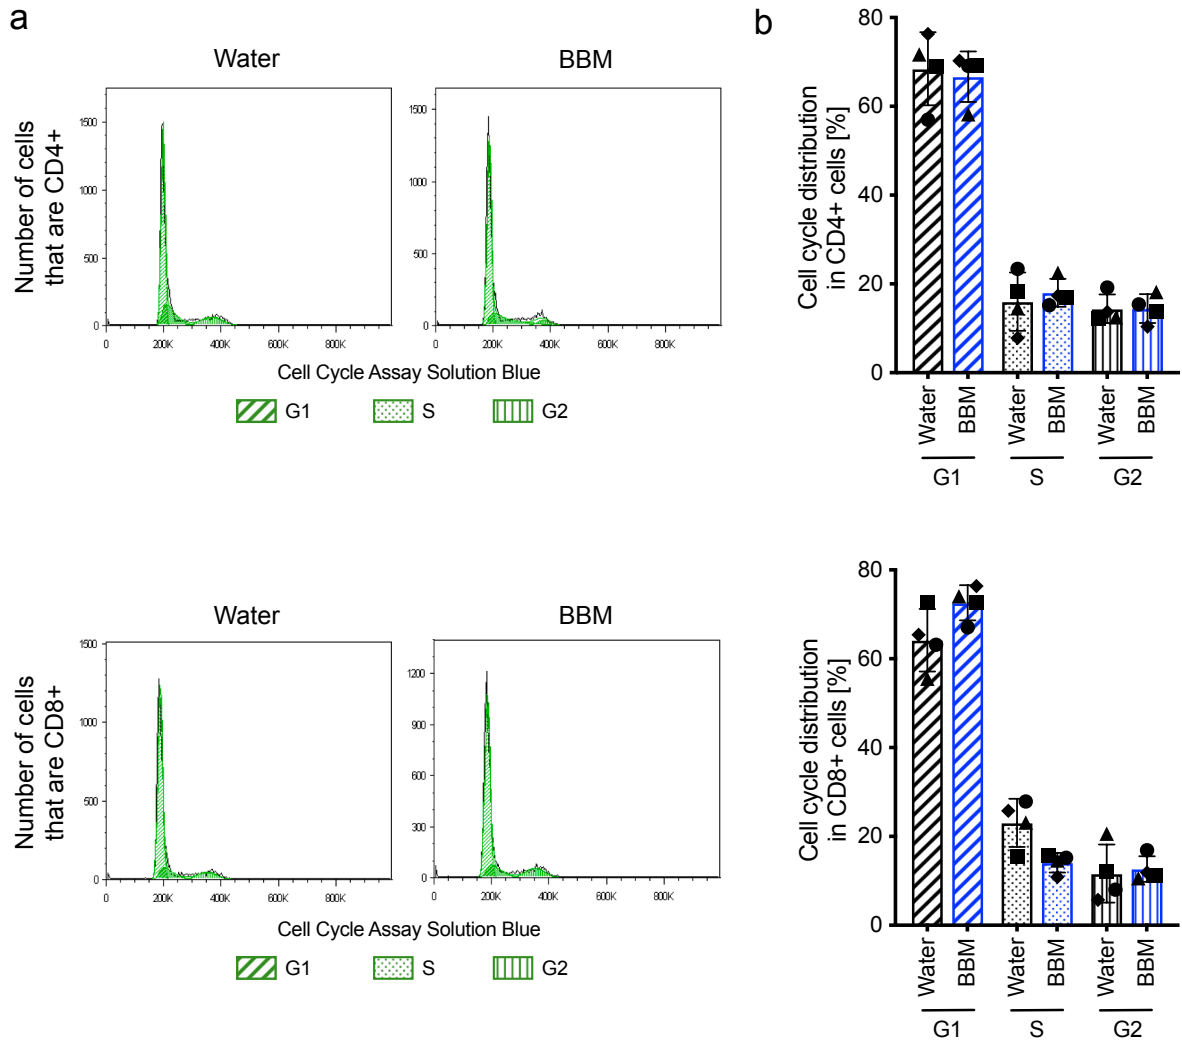

### Supplementary Figure 3

(a) Representative FACS plots to determine cell cycle phases in CD4+ (top) and CD8 $\beta$ + (bottom) cell populations.

(b) Distribution of cell cycle phases in CD4+ (left) and CD8 $\beta$ + (right) cell populations. Error bars indicate SD from four donors.

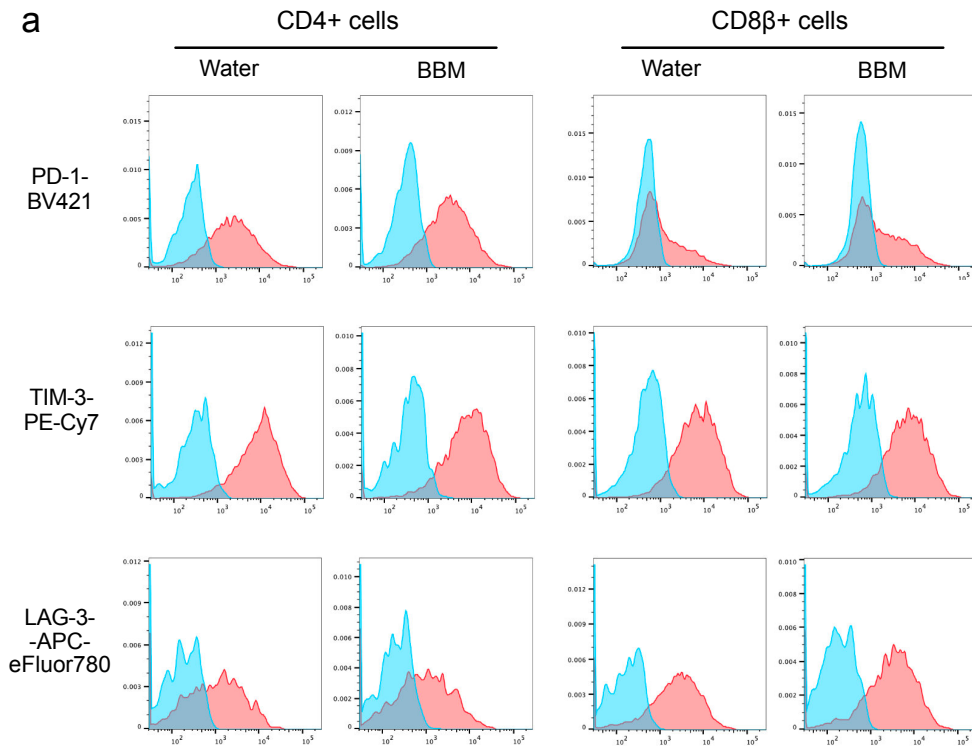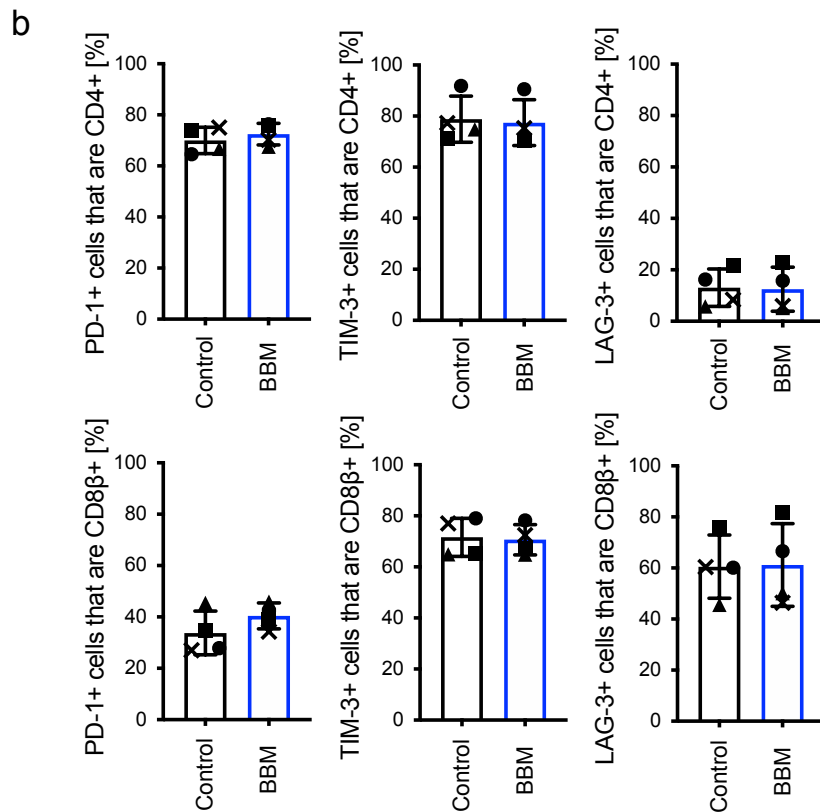

**Supplementary Figure 4**

(a) Representative FACS plots of T cell exhaustion markers cell cycle phases in CD4+ (left) and CD8β+ (right) cell populations.

(b) Percentages of exhaustion marker-positive cells in CD4+ (top) and CD8β+ (bottom) cell populations. Error bars indicate SD from four donors.

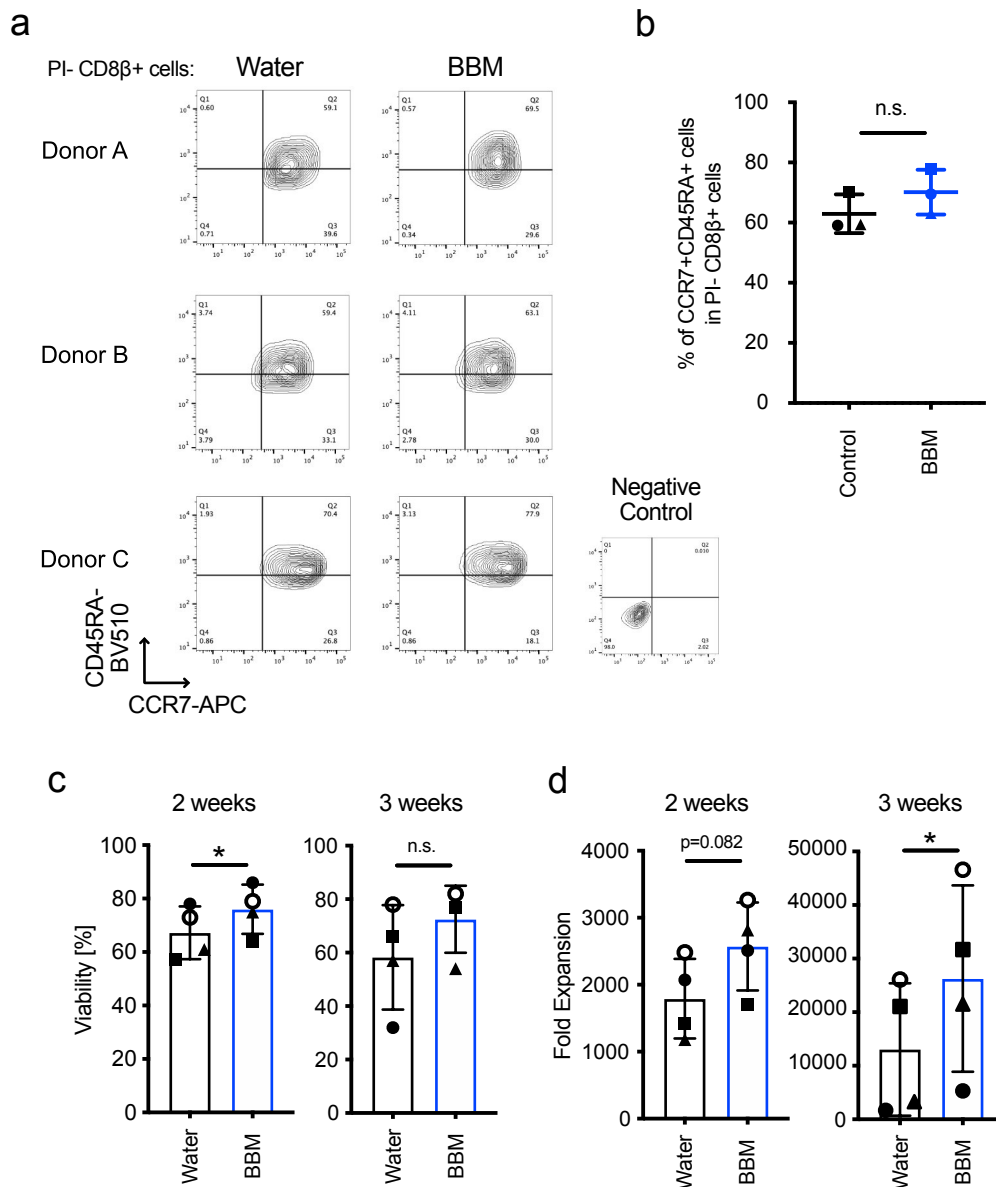

### Supplementary Figure 5

(a) Representative FACS plots of the expression of CCR7 and CD45RA at Day 0, the day injected into mouse (see Fig. 3a). PI-CD8 $\beta$ + cells are shown.

(b) Percentages of CCR7+CD45RA+ cells in CD8 $\beta$ + fractions at Day 0 (see Fig. 3a).

(c) Viability and fold expansion during long-term culture of primary CD8+ cells at 2 or 3 weeks after CD3/CD28 stimulation. Each data point represents one healthy donor. Error bars indicate SD from three (b) or four (c) donors. Statistical significance is denoted as follows: \*,  $p < 0.05$ ; \*\*,  $p < 0.01$ ; \*\*\*,  $p < 0.001$ ; and 'n.s.', not significant (paired t-test).

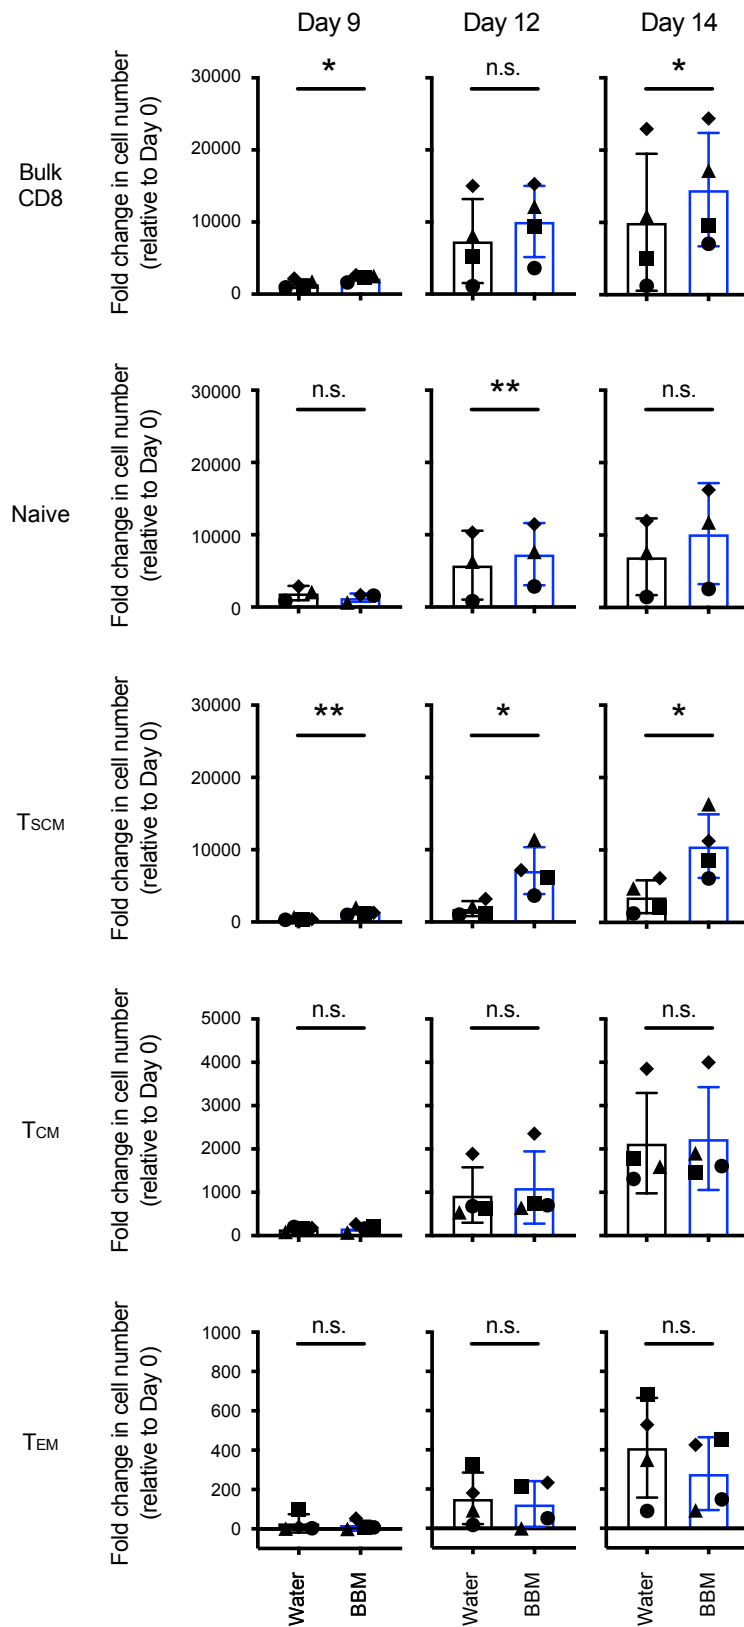

### Supplementary Figure 6

Cell proliferation of purified T cell fractions from healthy donor-derived CD8 $\beta$ + T cells. Bulk CD8 $\beta$ + cells sorted on FACS was also tested. Error bars indicate SD from three or four donors. Statistical significance is denoted as follows: \*,  $p < 0.05$ ; \*\*,  $p < 0.01$ ; \*\*\*,  $p < 0.001$ ; and 'n.s.', not significant (paired t-test).

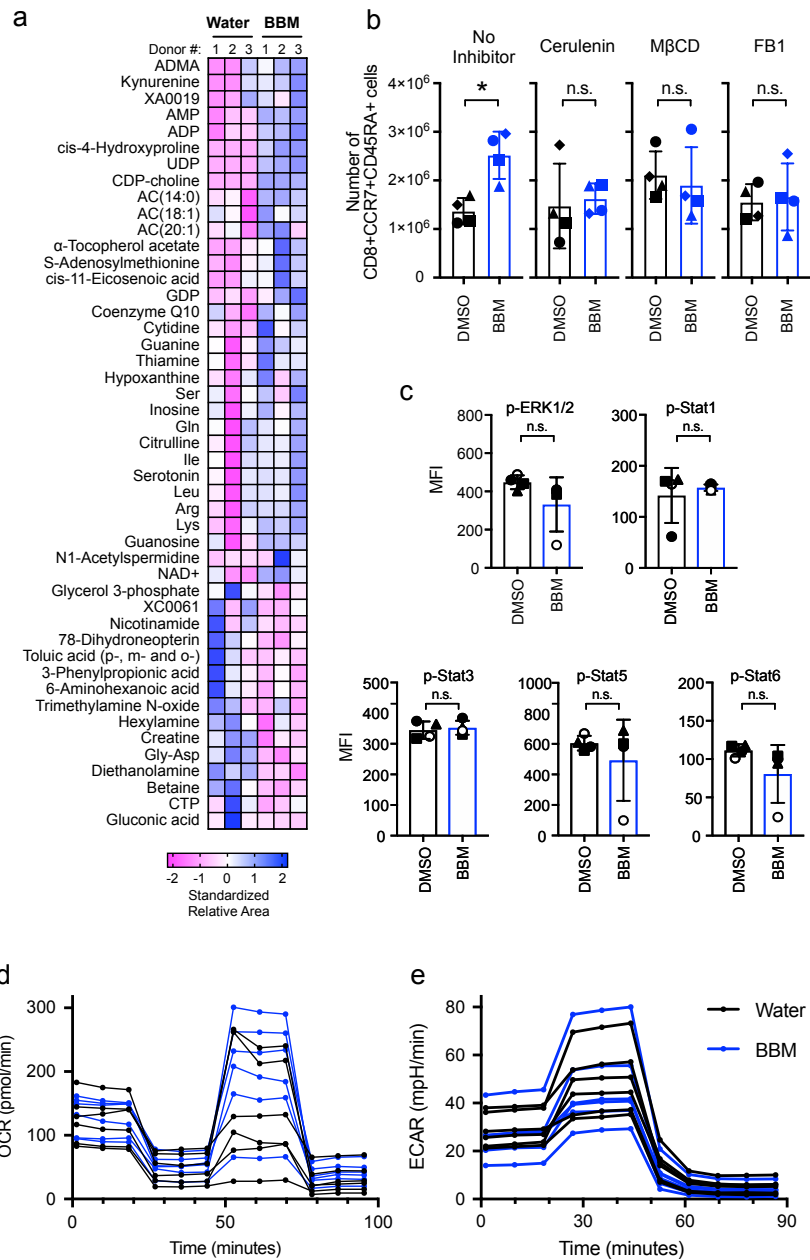

### Supplementary Figure 7

(a) Metabolites other than lipids commonly downregulated in all three donors.

(b) Effects of lipid metabolism-related inhibitors in combination with BBM. CD3<sup>+</sup> T cells were cultured in the presence of compounds for 14 d.

(c) MFI of phosphorylated proteins in CD8 $\beta$ <sup>+</sup> T cells. Error bars indicate SD from four donors.

(d) Oxygen consumption rate (OCR) and (e) extracellular acidification rates (ECAR) across time for BBM-treated CD3<sup>+</sup> T cells, related to Figures 5d and 5f, respectively. Each line indicates individual donors.

Statistical significance is denoted as follows: \*,  $p < 0.05$ ; \*\*,  $p < 0.01$ ; \*\*\*,  $p < 0.001$ ; and 'n.s.', not significant (paired t-test). M $\beta$ CD: Methyl-beta-cyclodextrin, FB1: Fumonisin B1.

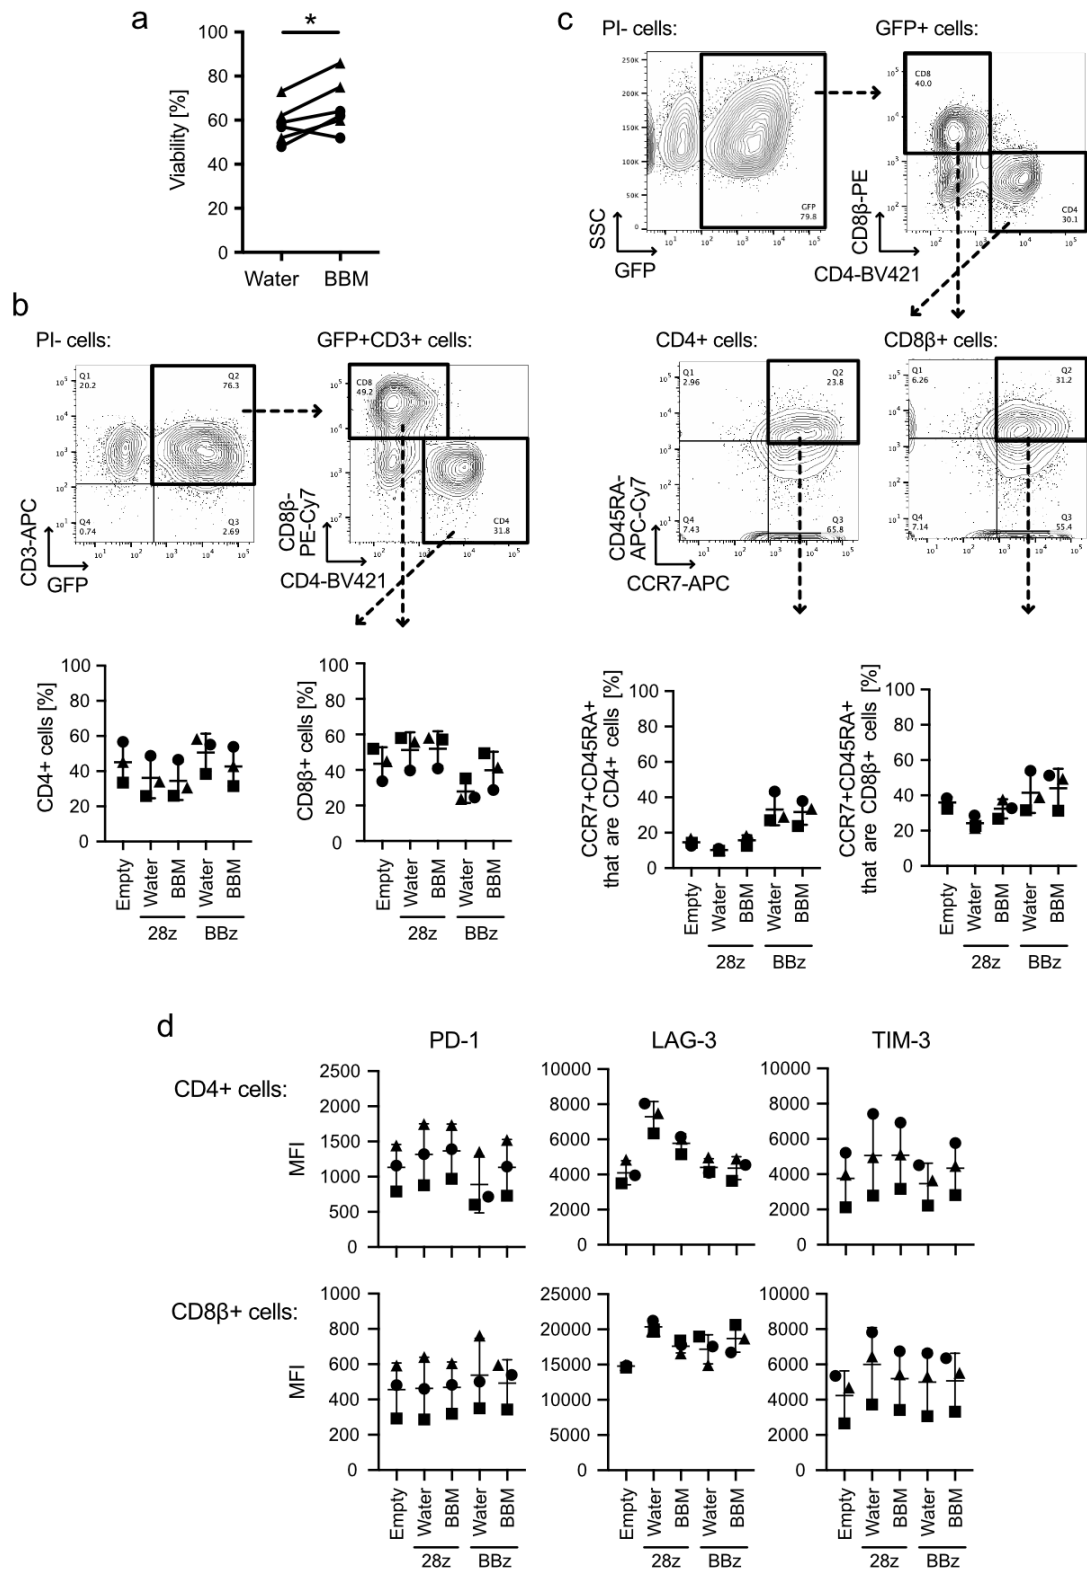

### Supplementary Figure 8

(a) Viability of CAR-T cells on day 10.

(b) Percentages of CD4+ and CD8β+ cells in indicated CAR-T cells. (c) Percentages of CCR7+CD45RA+ cells in CD4+ (left) and CD8β+ (right) cell populations in indicated CAR-T cells. (e) MFI of PD-1, LAG-3, or TIM-3 in CD4+ (top) and CD8β+ (bottom) cell populations in CAR-T cells. Error bars indicate SD from three donors. Statistical significance is denoted as follows: \*,  $p < 0.05$ ; \*\*,  $p < 0.01$ ; \*\*\*,  $p < 0.001$ ; and 'n.s.', not significant (paired t-test).



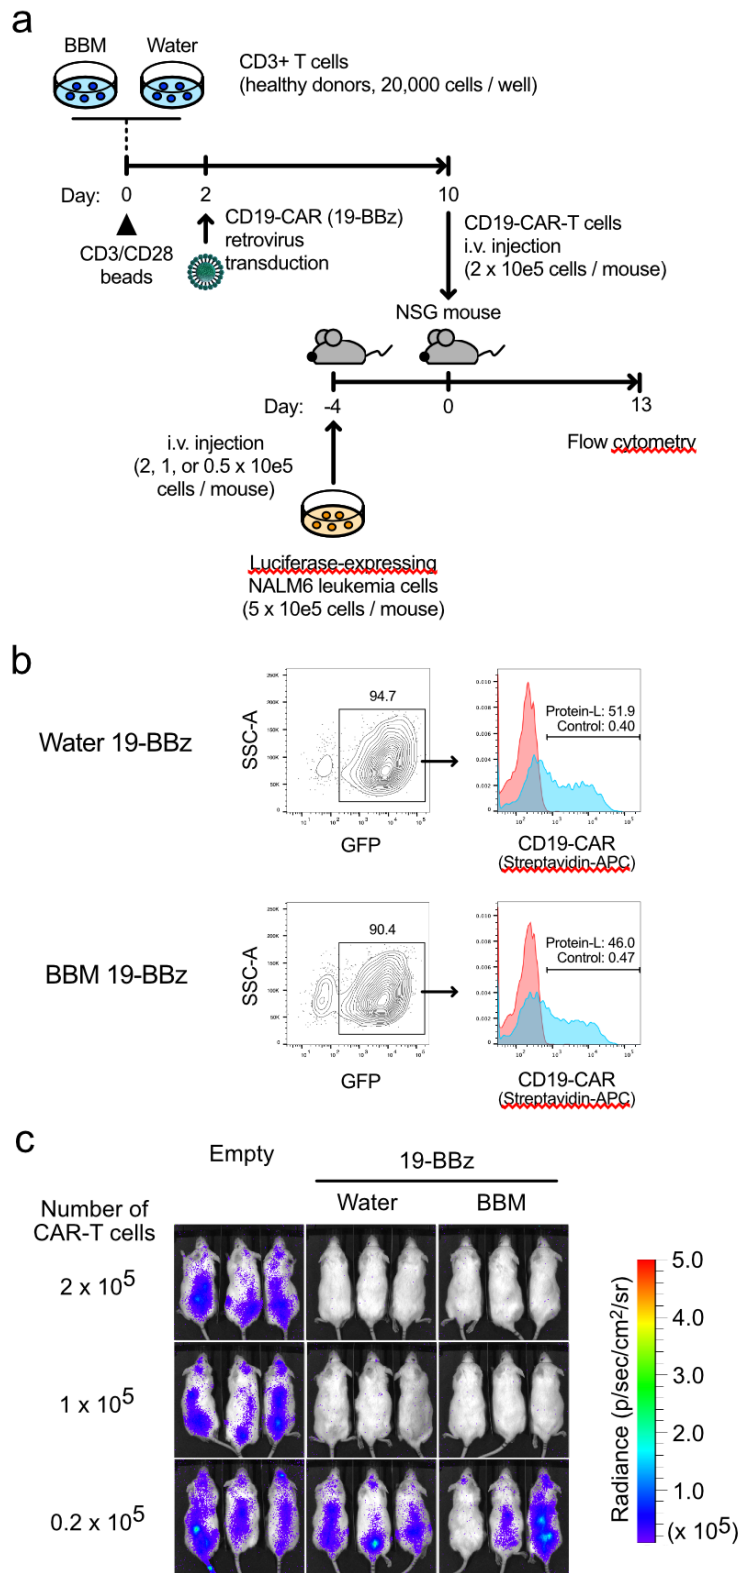

### Supplementary Figure 9

(a) Experimental scheme to compare the CAR-T cell numbers to inject into NALM6/NSG mice. (b) Representative flow cytometry plots that depict surface expression of CD19-CAR protein (19-BBz) on day 10. (c) IVIS images of mice that were injected with 19-BBz CAR-T cells thirteen days after the injection.

**Supplementary Table 1**

The DNA sequences of the anti-CD19 chimeric antigen receptors used in this study.

| CAR    | DNA sequence                                                                                                                                                                                                                                                                                                                                                                                                                                                                                                                                                                                                                                                                                                                                                                                                                                                                                                                                                                                                                                                                                                                                                                                                                                                                                                                                                                                                                                                                                                                                                                                                                                                                                                                                                                                                                                                                    |
|--------|---------------------------------------------------------------------------------------------------------------------------------------------------------------------------------------------------------------------------------------------------------------------------------------------------------------------------------------------------------------------------------------------------------------------------------------------------------------------------------------------------------------------------------------------------------------------------------------------------------------------------------------------------------------------------------------------------------------------------------------------------------------------------------------------------------------------------------------------------------------------------------------------------------------------------------------------------------------------------------------------------------------------------------------------------------------------------------------------------------------------------------------------------------------------------------------------------------------------------------------------------------------------------------------------------------------------------------------------------------------------------------------------------------------------------------------------------------------------------------------------------------------------------------------------------------------------------------------------------------------------------------------------------------------------------------------------------------------------------------------------------------------------------------------------------------------------------------------------------------------------------------|
| 19-28z | <p>ATGGCGCTGCCGGTGACCGCGCTGCTGCTGCCGCTGGCGCTGCTGCTGCATGCGGCGCGCC<br/>           CGGATATTCAGATGACCCAGACCACCAGCAGCCTGAGCGCGAGCCTGGGCGATCGCGTGACCA<br/>           TTAGCTGCCGCGGAGCCAGGATATTAGCAAATATCTGAACTGGTATCAGCAGAAACCGGATGG<br/>           CACCGTGAAACTGCTGATTTATCATACCAGCCGCTGCATAGCGGCGTGCCGAGCCGCTTTAGC<br/>           GGCAGCGGCAGCGGCACCGATTATAGCCTGACCATTAGCAACCTGGAACAGGAAGATATTGCCA<br/>           CCTATTTTTGCCAGCAGGGCAACACCCTGCCGTATACCTTTGGCGGCGGCACCAAACCTGGAAT<br/>           TACCGCGCGCGGCGGAGCGGCGGCGGCGGAGCAGCGGCGGCGGCGGAGCGAAGTGAAACT<br/>           GCAGGAAAGCGGCCCGGGCCTGGTGGCGCCGAGCCAGAGCCTGAGCGTGACCTGCACCGTG<br/>           AGCGGCGTGAGCCTGCCGATTATGGCGTGAGCTGGATTCGCCAGCCGCCGCGCAAAGGCCCT<br/>           GGAATGGCTGGGCGTGATTTGGGGCAGCGAAACCACCTATTATAACAGCGCGCTGAAAAGCCG<br/>           CCTGACCATTATTAAGATAACAGCAAAAGCCAGGTGTTTCTGAAAATGAACAGCCTGCAGACCCG<br/>           ATGATACCGCGATTTATTATTGCGCGAAACATTATTATTATGGCGGCAGCTATGCGATGGATTATTG<br/>           GGGCCAGGGCACCGAGCGTGACCGTGAGCAGCATTGAAGTGATGTATCCGCCGCCGATCTGGA<br/>           TAACGAAAAAGCAACGGCACCATTTATCATGTGAAAGGCAAACATCTGTGCCCGAGCCCGCTG<br/>           TTTCCGGGCCCGAGCAAACCGTTTTGGGTGCTGGTGGTGGTGGGCGGCGTGCTGGCGTGCTA<br/>           TAGCCTGCTGGTGACCGTGGCGTTTTATTTTTGGGTGCGCAGCAAACGCAGCCCGCTGCTG<br/>           CATAGCGATTATATGAACATGACCCCGCGCCGCCCGGGCCCGACCCGCAAACATTATCAGCCGT<br/>           ATGCGCCGCGCGCGGATTTTTCGCGCGTATCGCAGCAGAGTGAAGTTCAGCAGGAGCGCAGAC<br/>           GCCCCCGCGTACAAGCAGGGCCAGAACCAGCTCTATAACGAGCTCAATCTAGGACGAAGAGAG<br/>           GAGTACGATGTTTTGGACAAGAGACGTGGCCGGGACCCTGAGATGGGGGGAAAGCCGAGAAG<br/>           GAAGAACCCTCAGGAAGGCCTGTACAATGAACTGCAGAAAGATAAGATGGCGGAGGCCTACAGT<br/>           GAGATTGGGATGAAAGGCGAGCGCCGGAGGGGCAAGGGGCACGATGGCCTTTACCAGGGTCT<br/>           CAGTACAGCCACCAAGGACACCTACGACGCCCTTCACATGCAGGCCCTGCCCCCTCGC</p>        |
| 19-BBz | <p>ATGGCCTTACCAGTGACCGCCTTGCTCCTGCCGCTGGCCTTGCTGCTCCACGCCGCCAGGCCG<br/>           GACATCCAGATGACACAGACTACATCCTCCTGTCTGCCTCTCTGGGAGACAGAGTCACCATCA<br/>           GTTGACAGGGCAAGTCAGGACATTAGTAAATATTTAAATTGGTATCAGCAGAAACCAGATGGA<br/>           ACTGTTAACTCCTGATCTACCATAACATCAAGATTACACTCAGGAGTCCCATCAAGGTTTCAGTGGCAG<br/>           TGGGTCTGGAACAGATTATTCTCACCATTAGCAACCTGGAGCAAGAAGATATTGCCACTTACTT<br/>           TTGCCAACAGGGTAATACGCTTCCGTACACGTTTCGGAGGGGGGACCAAGCTGGAGATCACAGG<br/>           TGCGCGGTGGCTCGGGCGGTGGTGGGTGGGTGGCGGCGGATCTGAGGTGAAACTGCAGGAG<br/>           TCAGGACCTGGCCTGGTGGCGCCCTCACAGAGCCTGTCGTCACATGCACTGTCTCAGGGGTC<br/>           TCATTACCCGACTATGGTGAAGCTGGATTCCGACGCTCCACGAAAGGGTCTGGAGTGGCTGG<br/>           GAGTAATATGGGGTAGTGAAACCACATACTATAATTGAGTCTCAAATCCAGACTGACCATCATCA<br/>           AGGACAACCTCAAGAGCCAAGTTTTCTTAAAAATGAACAGTCTGCAAACCTGATGACACAGCCATT<br/>           TACTACTGTGCCAAACATTATTACTACGGTGGTAGCTATGCTATGGACTACTGGGGCCAAAGGAAC<br/>           CTCAGTCAACCGTCTCCTCAACCAGCAGCCAGCGCCGCGACCACCAACACCGGCGCCACCA<br/>           TCGCGTGCAGCCCTGTCCCTGCGCCAGAGGCGTGCCGGCCAGCGGCGGGGGGCGCAGT<br/>           GCACACGAGGGGGCTGGACTTCGCCTGTGATATCTACATCTGGGCGCCCTTGCCGGGACTTG<br/>           TGGGGTCTTCTCCTGTCACTGGTTATCACCCCTTACTGCAAACGGGGCAGAAAGAAACTCCTG<br/>           TATATATCAAACAACCATTTATGAGACCAGTACAACTACTCAAGAGGAAGATGGCTGTAGCTGC<br/>           CGATTTCCAGAAGAAGAAGAAGGAGGATGTGAACTGAGAGTGAAGTTCAGCAGGAGCGCAGAC<br/>           GCCCCCGCGTACAAGCAGGGCCAGAACCAGCTCTATAACGAGCTCAATCTAGGACGAAGAGAG<br/>           GAGTACGATGTTTTGGACAAGAGACGTGGCCGGGACCCTGAGATGGGGGGAAAGCCGAGAAG<br/>           GAAGAACCCTCAGGAAGGCCTGTACAATGAACTGCAGAAAGATAAGATGGCGGAGGCCTACAGT<br/>           GAGATTGGGATGAAAGGCGAGCGCCGGAGGGGCAAGGGGCACGATGGCCTTTACCAGGGTCT<br/>           CAGTACAGCCACCAAGGACACCTACGACGCCCTTCACATGCAGGCCCTGCCCCCTCGC</p> |
