# Supplementary material for: A culture method with berbamine, a plant alkaloid, enhances CAR-T cell efficacy through modulating cellular metabolism
Source: PubMed Central journal article supplement (PMC11150386; doi:10.1038/s42003-024-06297-0), 2024-06-04
Supplement: 42003_2024_6297_MOESM2_ESM.pdf [file 42003_2024_6297_MOESM2_ESM.pdf]

## Description of Additional Supplementary Files

File name: Supplementary Data 1

Description: The source data behind the graphs in the paper

File name: Supplementary Data 2

Description: The analyzed data from RNA-seq (Expected counts, Fig. 4bc)

File name: Supplementary Data 3

File name: The analyzed data from RNA-seq (TPM, Fig. 4d)
